# Supplementary material for: Occult zonulopathy detected during cataract surgery in patients with acute primary angle closure: a retrospective study
Source: PeerJ. 2025 Apr 18;13:e19330. doi: 10.7717/peerj.19330 (PMC12010992; doi:10.7717/peerj.19330)
Supplement: Supplemental Information 1 [file peerj-13-19330-s001.xlsx]

## Sheet: APAC
Pat.NO	Sex	Age	Ht_cm	Wt_kg	HBP	DM	Diagnosis	APAC_E	Contra_E	Occult_zon_APAC	Occult_zon_Contra	Surg_APAC_E	Surg_Contra_E	AL_APAC	K1_APAC	K2_APAC	ACD_APAC	LT_APAC	CCT_APAC	WTW_APAC	Pupil_APAC	Alpha_APAC	Deg_alpha_APAC	Kappa_APAC	Deg_kappa_APAC	AL_Contra	K1_Contra	K2_Contra	ACD_Contra	LT_Contra	CCT_Contra	WTW_Contra	Alpha_Contra	Deg_alpha_Contra	Pupil_Contra	Kappa_Contra	Deg_kappa_Contra
APAC.1	female	53	148	56	No	No	Uni.APAC	left	right	Yes	na	2	na	21.29	46.21	47.48	2.25	4.62	485	10.4	3.6	0.781025	140.199	0.5	354	21.16	46.13	46.98	2.22	4.78	474	10.8	0.5	36.871	1.6	0.2	216
APAC.2	female	59	162	60	Yes	No	Uni.APAC	left	right	Yes	na	3	na	23.33	43.22	43.91	1.97	4.67	664	11.2	5.6	0.894427	116.568	0.6	304	23.13	42.77	44.08	2.59	4.64	547	11.2	0.848528	45.0013	3.2	0.4	194
APAC.3	female	70	149	40	No	No	Uni.APAC	right	left	Yes	na	2	na	22.18	45.81	47.14	2.18	5.15	519	11	6.3	0.412311	345.963	0.9	219	22.02	46.11	47.98	2.17	5.29	499	11.6	0.4	180.005	3.2	0.2	327
APAC.4	female	64	148	65	No	No	Uni.APAC	left	right	No	na	1	na	22.21	44.56	44.8	2.17	5.17	566	11.6	4.7	0.583095	149.041	0.3	301	22.09	44.44	45.06	2.19	5.19	528	11.6	0.583095	329.035	5.1	0.3	189
APAC.5	female	68	145	45	No	No	Uni.APAC	right	left	No	na	3	na	21.47	45.52	47.71	2.22	4.84	580	10.4	3.2	0.316228	18.4355	0.5	185	21.64	45.66	46.88	2.17	4.99	545	10.8	0.447214	206.561	1.5	0.1	75
APAC.6	female	64	164	67	Yes	No	Uni.APAC	left	right	No	na	3	na	22.08	45.11	45.36	1.66	5.38	552	11.4	1.4	0.447214	153.439	0.4	317	22.17	45.19	45.4	2.11	5.32	526	11.3	0.447214	26.5658	1.4	0.4	230
APAC.7	male	73	163	50	Yes	No	Uni.APAC	right	left	Yes	No	1	1	23.05	44.16	44.9	2.3	4.96	517	11.9	4.8	0.824621	284.034	1.2	90	22.93	43.38	44.74	2.58	4.73	462	11	0.583095	149.041	1.7	0	186
APAC.8	female	81	142	52	Yes	No	Uni.APAC	right	left	No	na	1	na	23.07	42.14	43.85	2.28	5.35	555	11	3.4	0.8544	20.5567	0.5	205	22.9	43.53	44.16	2.42	5.28	519	11.2	0.583095	149.041	4.9	0.3	295
APAC.9	female	83	155	43	No	No	Uni.APAC	left	right	Yes	No	2	2	23.45	41.91	43.39	2.4	4.93	618	11.6	3.9	0.860233	125.541	0.5	335	23.49	42.02	42.7	2.45	5	542	11.9	0.509902	11.3103	1.8	0.5	194
APAC.10	female	70	143	53	No	No	Uni.APAC	right	left	Yes	na	3	na	23.04	43.96	44.46	2.07	5.46	568	11	5.8	0.707107	314.999	0.3	337	23.12	42.45	43.53	2.2	5.5	570	11.2	1.20416	221.629	4.1	1.4	62
APAC.11	female	70	151	50	No	No	Uni.APAC	right	left	No	na	1	na	22.85	45.43	45.88	1.86	5.06	488	11.3	4.8	1.58114	71.5672	1.2	222	22.76	43.0382	43.236	2.32	5.03	517	11.5	0.3	180.005	1.9	0.4	299
APAC.12	female	66	146	87	Yes	No	Uni.APAC	right	left	No	No	3	3	21.86	44.83	45.29	2.02	5.28	524	10.5	1.6	0.948683	18.4355	2.3	254	21.82	45.1	45.93	2.12	5.27	527	11.1	0.412311	165.969	2.2	0.3	3
APAC.13	female	59	156	55	No	No	Uni.APAC	right	left	Yes	na	1	na	22.69	44.17	44.43	2.4	4.56	477	11.3	2.2	0.583095	30.9647	0.4	143	22.78	43.55	43.83	2.45	4.6	486	11.5	0.538516	158.203	2.5	0.1	20
APAC.14	female	73	142	62	Yes	No	Uni.APAC	right	left	Yes	na	3	na	23.3	42.16	44.09	2.12	5.41	539	11	2	0.4	0	0.1	66	23.05	44.1	45.14	2.09	5.35	519	11.3916	0.283543	90	2.58725	0.0521211	354.549
APAC.15	female	64	154	60	Yes	No	Uni.APAC	right	left	Yes	No	2	2	23.09	42.98	43.43	2.18	5.5	592	11.9	2.1	0.360555	326.309	0.3	159	23.17	42.66	42.99	2.24	5.47	565	12	0.316228	198.43	1.7	0.1	46
APAC.16	female	64	152	55	Yes	No	Uni.APAC	right	left	No	na	3	na	22.18	44.3	44.72	2.22	5.11	542	11.2	5.1	1.80278	236.306	1.3	353	22.07	44.99	45.33	2.21	5.12	513	11.6	0.5	143.134	1.7	0.5	345
APAC.17	female	75	156	40	No	No	Uni.APAC	right	left	Yes	No	3	3	22.45	42.32	44.27	2.08	5.65	614	11.4	2.2	0.5	0	0.6	136	22.64	42.91	43.74	1.45	5.58	578	11.7	0.538516	158.203	1.8	0.4	25
APAC.18	female	81	149	47	No	Yes	Uni.APAC	left	right	Yes	na	2	na	23.82	42.18	43.25	2.33	4.97	553	11.7	4.5	0.1	0	0.2	233	23.75	41.82	43.39	2.26	5.04	548	11.3	0.316228	341.565	2.6	0.4	256
APAC.19	female	65	157	70	Yes	Yes	Uni.APAC	left	right	No	na	3	na	22.39	44.49	48.09	2.26	5.29	613	11.4	3.6	0.728011	105.949	0.3	269	22.23	45.55	46.32	2.37	5.31	552	10.9	1.02956	60.9472	3.4	0.1	166
APAC.20	male	61	158	56	No	No	Uni.APAC	left	right	No	na	3	na	23.41	42.25	42.97	2.42	4.66	585	11.3	3.5	0.7	180.005	0.3	353	23.29	42.73	43.09	2.46	4.68	537	12	0.412311	345.963	4.5	0.2	183
APAC.21	female	88	157	73	No	No	Uni.APAC	right	left	Yes	na	3	na	22.46	41.69	43.89	1.74	5.9	560	11.9	2.6	0.412311	345.963	0.5	205	22.58	42.83	44.79	1.93	5.88	490	11.8	0.5	126.874	1.9	0.3	295
APAC.22	male	67	169	65	No	No	Uni.APAC	left	right	Yes	na	2	na	22.41	43.85	44.14	2.41	4.66	629	11.3	5.9	0.984886	113.966	0.3	339	22.69	43.95	44.11	2.37	4.52	488	11.5	0.5	0	2.5	0.3	194
APAC.23	female	69	157	54	No	No	Uni.APAC	left	right	Yes	na	2	na	23.23	42.75	45.79	2.47	4.51	540	11.5	5	0.984886	246.034	0.6	31	23.98	42.24	44.48	2.71	4.49	520	11.2	1.16619	300.962	3.8	1.1	113
APAC.24	female	68	156	62	No	No	Uni.APAC	right	left	Yes	No	3	3	21.62	42.11	44.32	1.56	5.66	624	10.6	1.29322	1.21146	64.5109	0.385853	299.091	22.02	44.98	45.51	2.33	5.37	582	11.5	1.45602	254.051	3.2	0.6	43
APAC.25	female	58	157	60	No	No	Uni.APAC	right	left	Yes	na	2	na	20.83	44.8	45.37	2.1	4.7	605	10.5	5.2	0.806226	29.7458	0.5	184	20.91	44.52	45.6	1.96	4.77	582	11	0.509902	191.305	2.1	0.4	45
APAC.26	female	51	166	59	No	No	Uni.APAC	left	right	No	na	3	na	22.18	44.32	44.85	2.34	4.95	541	11.5	4.7	0.447214	153.439	0.8	359	22.18	43.48	45.53	2.42	4.87	480	11.6	0.2	0	3.2	0.1	124
APAC.27	male	52	162	62	No	No	Uni.APAC	right	left	Yes	na	1	na	22.66	44.11	46.43	1.92	5.09	776	11.8	4.1	0.583095	30.9647	0.9	158	22.68	44.56	45.09	1.99	4.91	567	11.6	0.608276	170.543	2.7	0.5	343

## Sheet: Control
Pat.NO	Sex	Age	Ht_cm	Wt_kg	HBP	DM	Diagnosis	Fir_Sug_eye	Occult_zon_R	Occult_zon_L	Surgeon_R	Surgeon_L	AL_R	K1_R	K2_R	ACD_R	LT_R	CCT_R	WTW_R	Pupil_R	Alpha_R	Deg_alpha_R	Kappa_R	Deg_kappa_R	AL_L	K1_L	K2_L	ACD_L	LT_L	CCT_L	WTW_L	Pupil_L	Alpha_L	Deg_alpha_L	Kappa_L	Deg_kappa_L
Con.1	female	67	153	52	No	No	Cataract	right	No	No	3	1	24.6	43.01	43.91	3.47	4.08	533	12	3.5	0.412311	14.0434	0.1	124	24.53	43.19	43.74	3.43	4.05	540	11.3	4	1.86815	195.441	1.5	34
Con.2	male	70	164	75	Yes	Yes	Cataract	left	No	No	1	1	24.5	42.27	43.06	3.65	4.98	590	12.1	5.4	1.3	292.586	0.8	147	24.23	40.6	42.23	3.78	4.6	624	11.7	5.8	1.81108	186.252	1.4	7
Con.3	female	80	133	75	Yes	Yes	Cataract	left	No	No	1	1	23.58	40.76	41.17	3.23	4.69	568	12.3	3.7	0.447214	26.5785	0.1	214	23.56	40.38	42.75	3.1	4.26	640	11.6	4.5	1.74642	193.156	1.4	22
Con.4	female	64	151	48	No	No	Cataract	right	No	Yes	3	2	22.13	46.64	47	2.24	4.97	530	11.6	4.6	1.48661	312.249	1.2	137	22.32	45.9	46.82	2.22	4.95	530	11.8	4.2	1.20416	274.72	1.1	115
Con.5	female	79	147	54	Yes	No	Cataract	left	No	No	3	3	23.1	43.09	44.28	2.71	4.65	533	11.9	4.1	0.509902	348.684	0.4	160	22.97	42.69	44.72	2.82	4.47	532	11.5	3.7	1.3	180.091	1	3
Con.6	female	75	155	51	No	No	Cataract	left	No	No	2	2	22.65	46.29	46.74	2.76	4.88	546	11.6	3.7	0.447214	296.533	0.3	230	22.67	45.9	46.81	2.56	5.05	547	11.2	3.7	0.8544	200.475	0.9	346
Con.7	female	74	147	58	Yes	No	Cataract	left	No	No	1	1	22.53	42.93	43.73	2.43	4.56	515	11.6	2.4	0.640312	308.634	0.2	166	22.3052	43.5	43.75	1.75	5.8	532	12.7	3.6	0.948683	341.556	0.9	204
Con.8	male	61	155	47.5	Yes	No	Cataract	left	No	No	2	2	23.9	43.6	43.98	3.7	4.1	467	12.3	2.8	0.360555	33.7072	0.4	220	23.71	43.78	44.52	3.99	3.73	486	12.4	4	0.509902	168.776	0.7	325
Con.9	male	72	160	72	Yes	Yes	Cataract	right	No	No	3	2	23.47	43.39	44.81	3.31	4.05	545	11.3	2.8	0.412311	345.957	0.3	136	23.54	43.36	44.54	3.26	4.19	560	11.4	3	0.360555	213.616	0.7	137
Con.10	male	61	168	65	Yes	Yes	Cataract	left	No	No	1	1	25.54	43.43	44.16	3.55	4.04	550	12	3.6	0.4	90.0456	0.4	275	25.28	43.2	43.85	3.54	4.23	574	11.8	3.3	0.538516	111.858	0.6	273
Con.11	male	76	162	53	Yes	No	Cataract	right	No	No	3	3	23.2	44.09	45.97	3.35	4.58	513	11.7	2.7	0.424264	45.0228	0.6	233	23.2	43.88	45.46	3.33	4.65	527	11.5	2.7	0.5	126.934	0.6	290
Con.12	male	65	168	64	No	No	Cataract	right	No	No	1	1	23.48	44.16	45.35	3.31	3.85	598	10.6	3.4	1.23693	14.0434	0.8	197	23.35	44.94	45.34	3.2	4.02	588	10.7	4.1	0.921954	167.556	0.6	323
Con.13	female	69	146	50	No	No	Cataract	left	No	No	3	1	23.46	43.77	44.53	3	4.49	558	11.8	3.9	0.447214	63.4671	0.3	252	23.46	43.8	44.19	3.09	4.43	562	12	3.5	0.360555	146.384	0.6	283
Con.14	male	87	166	70	Yes	No	Cataract	left	No	No	2	1	24.06	40.31	41.26	2.61	5.03	555	12.1	2.5	0.632456	18.4443	0.6	220	23.93	39.64	42.15	2.79	4.5	550	12.1	5.7	0.509902	168.776	0.6	319
Con.15	female	86	150	40.5	No	Yes	Cataract	left	No	No	1	1	22.62	42.8	45.39	2.75	4.64	576	11.1	3	0.894427	63.4671	0.3	192	22.57	42.67	45.47	2.7	4.56	569	11.5	3.6	0.707107	81.9114	0.5	244
Con.16	female	73	160	94	Yes	Yes	Cataract	left	No	No	2	1	24.38	43.06	45.15	3.51	4.88	533	11.6	3.2	0.4	0	0.2	108	24.11	42.88	45.76	3.58	4.6	540	11.7	2.9	0.412311	76.0023	0.5	227
Con.17	female	79	152	65	Yes	Yes	Cataract	right	No	No	1	1	22.65	44.67	45.45	2.78	4.4	527	10.9	2.9	0.6	0	0.4	147	22.4	44.72	45.34	2.51	4.72	544	11.3	2.9	0.67082	206.487	0.5	5
Con.18	female	76	147	50	Yes	Yes	Cataract	right	Yes	Yes	3	3	22.54	42.63	46.64	3.16	4.02	488	10.8	6	0.707107	351.866	0.6	155	22.33	42.82	46.05	2.9	4.3	509	10.8	5.8	0.860233	234.399	0.5	57
Con.19	female	63	152	46	No	No	Cataract	right	No	No	2	2	25.57	43.62	45.24	3.33	4.31	477	12	3.1	0.781025	309.78	0.6	221	25.58	43.86	45.04	3.56	4.36	490	12.1	2.9	0.921954	229.332	0.5	303
Con.20	male	61	178	82	No	No	Cataract	left	No	No	3	2	24.85	43.04	43.78	3.56	3.6	571	11.4	3.5	0.707107	45.0228	0.4	243	24.72	43.57	44.07	2.77	5.14	579	11.2	4.6	0.806226	119.806	0.4	281
Con.21	female	79	147	48	Yes	Yes	Cataract	right	No	No	2	2	22.23	45.41	46.36	2.98	4.38	538	11.6	3.8	0.412311	345.957	0.3	185	22.23	45.15	46.11	2.95	4.8	552	11.1	3.6	0.72111	123.753	0.4	310
Con.22	female	69	160	54	No	No	Cataract	left	No	No	3	2	23.9	42.91	43.76	3.05	4.34	549	12.1	4	0.8544	290.521	0.4	215	23.79	42.91	43.75	2.97	4.37	543	11.4	3.7	0.583095	149.112	0.4	315
Con.23	male	74	158	80	No	No	Cataract	right	No	No	1	1	23.53	45.4	47.54	2.61	4.6	484	11	2.7	0.447214	26.5785	0.3	225	23.48	44.93	45.87	2.59	4.88	502	11.2	2.6	0.5	143.203	0.4	292
Con.24	female	79	152	54	Yes	Yes	Cataract	right	No	No	1	1	22.58	44.34	47.2	2.48	5.07	557	11.1	3.6	0.424264	314.977	0.4	216	22.58	44.76	46.97	2.59	5.1	576	10.9	3.6	0.632456	161.647	0.4	321
Con.25	female	72	156	60	No	Yes	Cataract	left	No	No	1	1	22.66	43.52	44.51	2.47	4.51	518	11.5	2.8	0.72111	326.293	0.6	194	22.91	43.55	43.55	2.61	4.32	525	11.4	2.9	0.538516	158.279	0.4	344
Con.26	female	70	161	52	Yes	Yes	Cataract	left	No	No	3	2	22.88	44.55	45.12	2.76	4.12	484	11.5	2.9	0.447214	26.5785	0.4	234	22.87	43.86	44.7	2.85	4.05	496	11.4	2.5	0.447214	153.513	0.4	280
Con.27	female	58	159	50	Yes	Yes	Cataract	right	No	No	1	2	21.84	46.04	46.62	2.83	4.11	570	10.9	2.4	0.3	0	0.3	222	21.6	45.67	46.67	3.71	3.9	601	10.9	2.5	0.538516	158.279	0.4	319
Con.28	female	71	137	40	No	No	Cataract	left	No	No	1	3	19.58	50.07	51.35	2.04	5.54	512	11.4	3.6	0.3	269.954	0.4	229	19.66	51.21	52.6	2.02	5.68	529	11.2	4.2	0.223607	153.513	0.4	140
Con.29	female	72	159	42	No	No	Cataract	left	No	No	1	1	22.7	43.57	44.16	2.47	5.02	488	12.1	8.1	0.447214	26.5785	0.4	185	22.49	44.56	45.03	2.41	4.95	507	12.1	8.1	0.5	180.091	0.4	338
Con.30	female	67	150	55	Yes	Yes	Cataract	right	No	No	3	3	24.34	43.1	43.83	3.01	4.5	500	11.5	4.1	0.509902	11.3157	0.5	190	24.35	43.51	44.01	3.01	4.57	495	11.8	4.2	0.4	180.091	0.4	0
Con.31	male	63	170	68	No	No	Cataract	right	No	No	2	3	23.81	42.36	43.25	3.29	4.71	633	12.1	4	0.3	0	0.2	215	24.06	42.09	42.94	3.27	4.72	643	12.2	3.9	0.4	180.091	0.4	295
Con.32	female	77	156	64	Yes	Yes	Cataract	right	No	Yes	1	1	23.07	44.5	45.6	2.8	4.44	504	11.9	3.1	0.5	36.8886	0.5	248	23.08	43.34	45.79	2.67	4.51	514	11.8	2.9	0.5	180.091	0.4	292
Con.33	female	74	152	46	Yes	No	Cataract	right	No	No	1	1	23.32	43.81	44.84	2.82	4.41	482	11.5	2.8	0.316228	18.4443	0.3	235	23.39	43.78	44.92	2.93	4.54	518	11.4	2.8	0.3	180.091	0.4	313
Con.34	female	86	158	58	Yes	No	Cataract	left	No	No	1	3	22.5	45.04	45.37	2.41	5.43	531	11.8	4.1	0.447214	333.421	0.5	144	22.64	44.31	45.62	2.47	5.44	525	11.6	3.7	0.5	216.797	0.4	67
Con.35	female	71	149	50.5	Yes	No	Cataract	left	No	No	3	3	23.27	44.72	45.48	3.13	4.66	493	12.1	4.3	0.538516	291.767	0.2	156	23.62	44.13	45.31	3.44	4.17	511	11.5	3.5	1.20416	228.3	0.4	353
Con.36	male	72	165	50	Yes	No	Cataract	left	No	No	2	3	24.69	43.24	43.99	3.71	4.1	522	11.8	4.6	0.608276	350.533	0.9	110	24.7648	43.44	44.11	2.35	5.45	535	12.2	4.7	1.31529	261.204	0.4	353
Con.37	male	76	165	70	Yes	No	Cataract	right	No	No	1	1	23.33	41.68	42.95	3.2	4.03	477	11.2	2.1	0.640312	51.3662	0.3	203	23.18	43.66	44.04	3.18	4.11	501	11	2.4	0.984886	114.02	0.3	359
Con.38	male	79	163	70	Yes	Yes	Cataract	right	No	No	1	1	23.65	41.65	42.38	3.07	5	591	12.1	3.7	0.360555	33.7072	0.2	222	23.13	42.57	43.23	2.75	5.39	597	12	3.8	0.781025	129.871	0.3	322
Con.39	male	70	164	66	Yes	Yes	Cataract	left	No	No	1	1	23.07	44.16	45.11	3.07	4.8	513	11.5	4.2	0.412311	14.0434	0.2	201	23.06	43.69	44.42	2.99	4.81	518	11.3	3.5	0.608276	99.5128	0.3	312
Con.40	male	64	170	83	Yes	No	Cataract	left	No	No	2	3	24.11	44.02	44.32	3.34	5.02	499	12.1	3.9	0.316228	71.6014	0.2	254	24.01	43.48	44.4	3.27	5	499	12	4.5	0.583095	121.025	0.3	285
Con.41	female	60	154	61	Yes	No	Cataract	right	No	No	1	3	22.86	44.8	45.5	3.3	4.11	510	10.7693	4.54215	0.554264	355.398	0.597002	201.45	22.9	44.66	45.65	3.28	4.08	506	10.7	4	0.781025	140.266	0.3	343
Con.42	female	78	153	55	No	No	Cataract	left	No	No	1	1	22.43	44.56	44.84	2.79	4.41	541	11.4	3.2	0.282843	45.0228	0.6	219	22.43	44.64	44.92	2.75	4.59	571	11.6	3.8	0.565685	135.068	0.3	304
Con.43	male	69	168	72.5	Yes	No	Cataract	right	No	No	1	2	22.98	45.05	45.6	2.9	4.41	516	11.6	3.8	0.412311	345.957	0.5	222	23.05	44.48	44.8	2.92	4.43	541	11.4	3.6	0.72111	146.384	0.3	311
Con.44	male	90	153	69	Yes	No	Cataract	left	No	No	1	1	23.09	43.2	43.81	2.77	4.65	537	11.7	4.7	0.608276	9.46712	0.4	216	23.07	43.2	43.85	2.38	5.44	538	12	4.9	0.424264	135.068	0.3	262
Con.45	female	71	155	64	No	No	Cataract	left	No	No	1	1	24.08	42.29	42.77	3.12	4.29	510	12.1	3.5	0.7	0	0.5	177	24.01	41.98	42.43	3.16	4.15	535	11.9	3.7	0.583095	149.112	0.3	335
Con.46	male	81	147	51	Yes	No	Cataract	right	No	No	2	2	23	43.16	44.85	2.95	5.22	488	11.7	3.5	0.6	0	0.3	208	22.87	43.81	45.71	2.93	5.22	503	11.4	3.7	0.67082	153.513	0.3	316
Con.47	male	67	166	63	No	No	Cataract	left	No	No	1	3	24.39	42.67	43.44	3.66	3.98	535	12.1	2.6	0.5	36.8886	0.3	262	24.42	42.96	43.47	3.64	3.96	545	12.1	3.8	0.447214	153.513	0.3	280
Con.48	male	80	160	56.5	No	No	Cataract	left	No	No	3	3	24.6	41.53	42.87	2.51	5.2	498	12	3.9	0.72111	56.3385	0.3	206	24.55	40.86	42.9	2.53	5.16	513	12.1	3.7	0.538516	158.279	0.3	308
Con.49	female	60	162	77	No	No	Cataract	left	No	No	2	2	23.31	43.5	44.38	3.04	4.7	535	11.9	3.5	0.67082	26.5785	0.2	192	23.5	43.69	44.18	3.28	4.45	536	11.9	3.7	0.632456	161.647	0.3	360
Con.50	female	71	156	50	No	Yes	Cataract	right	No	No	3	2	22.17	46.71	47.29	2.38	5.41	550	11	3.2	0.447214	26.5785	0.4	197	22.39	46.73	47.81	2.56	5.21	563	11.1	3.6	0.447214	153.513	0.3	316
Con.51	female	74	141	30	No	No	Cataract	right	No	No	1	3	22.4	46.04	46.18	2.43	4.77	504	11.4	2.6	0.3	0	0.3	179	21.65	45.36	46.32	2.37	4.89	512	11.3	2.8	0.282843	135.068	0.3	324
Con.52	female	69	154	69	No	No	Cataract	left	No	No	2	2	23.12	44.12	44.39	3	4.21	528	11.6	3.9	0.424264	45.0228	0.4	266	23.19	44.01	44.19	3.1	4.24	538	11.8	3.9	0.412311	166.048	0.3	258
Con.53	female	68	154	66	Yes	No	Cataract	right	No	No	3	3	22.26	45.52	46.25	2.65	4.97	513	11.5	3.9	0.640312	308.634	0.4	211	22.1	45.58	46.13	2.86	4.88	526	11.4	3.3	0.316228	161.647	0.3	283
Con.54	female	74	147	42	Yes	No	Cataract	left	No	No	2	2	22.94	45.04	45.88	3.3	4.2	550	11.6	2.9	0.4	0	0.1	188	22.91	44.89	45.87	3.3	4.18	545	11.4	3.3	0.6	180.091	0.3	347
Con.55	female	62	152	46	Yes	Yes	Cataract	left	No	No	1	1	22.63	45.82	46.16	2.39	5.15	502	11	2.9	0.316228	341.556	0.1	216	22.63	45.59	46.32	2.31	5.37	540	11.4	3.4	0.316228	198.353	0.3	313
Con.56	female	65	157	75	No	Yes	Cataract	right	No	No	3	3	24.12	43.91	44.21	3.36	4.64	531	12.1	4.4	0.223607	296.533	0.2	210	23.99	43.84	43.99	3.25	4.71	549	12	4.9	0.360555	213.616	0.3	308
Con.57	male	75	160	55	No	No	Cataract	right	No	No	3	2	23.5	45.33	45.78	3.32	4.49	526	11.6	3.5	0.583095	30.9795	0.3	210	23.48	45.42	45.81	3.15	4.82	524	12	3.6	0.538516	201.721	0.3	300
Con.58	female	63	145	46	No	Yes	Cataract	left	No	No	1	2	22.46	44.89	45.91	3.49	3.63	542	11.4	2.5	0.538516	21.8125	0.3	212	22.65	44.59	45.91	3.57	3.59	541	11.4	2.6	0.282843	224.932	0.3	211
Con.59	female	76	152	47	Yes	Yes	Cataract	right	No	No	2	3	21.3	43.76	46.81	2.64	4.49	455	11.1	3.4	0.921954	319.378	1	129	21.48	45.19	47.27	2.69	4.29	464	11.5	3.6	0.5	233.066	0.3	303
Con.60	male	75	163	57	Yes	No	Cataract	right	No	No	1	1	23.39	43.87	44.96	3.3	4.02	557	11.7	2.6	0.640312	321.321	0.3	174	23.43	42.12	43.69	3.21	4.11	556	11.5	2.7	0.781025	219.734	0.3	33
Con.61	male	77	155	60	Yes	Yes	Cataract	right	No	No	2	2	22.06	44.9	46.44	2.46	5.27	481	11.4	3.1	0.4	0	0.2	183	22.12	45.71	46.31	2.63	5.1	512	11.6	2.5	0.640312	231.275	0.3	308
Con.62	female	63	154	50	No	No	Cataract	right	No	No	2	3	25.25	41.78	43.65	3.06	5.07	477	12.6	4	0.538516	338.188	0.3	193	24.98	41.48	42.89	2.9	5.04	491	12.8	4.1	0.948683	251.51	0.3	5
Con.63	female	70	149	57	No	No	Cataract	right	No	No	3	3	22.48	45.13	45.86	3.34	4.12	518	11.8	3.1	1.3	269.954	0.5	153	22.39	45.53	46.15	3.23	4.12	544	11.7	3.3	1.07703	248.142	0.3	351
Con.64	female	76	133	42	Yes	No	Cataract	right	No	No	1	1	22.1	46.32	47.07	2.55	5.09	484	11.0046	2.82479	0.904404	287.793	0.494406	178.424	21.86	46.55	46.97	2.39	5.04	489	11.6	3.4	1.10454	264.757	0.3	287
Con.65	female	70	151	65	No	No	Cataract	right	No	No	3	2	21.98	48.96	54.88	2.88	3.58	494	11.0816	2.01623	0.769548	330.625	0.517475	185.792	21.8386	46.4	47.8	2.71	3.79	509	11.4	2.4	1.26491	251.51	0.3	353
Con.66	female	70	145	45	Yes	Yes	Cataract	right	No	No	1	1	23.76	41.03	43.63	2.29	5.16	505	11.8	3.5	0.447214	26.5785	0.2	204	23.7	41.6	43.57	2.26	5.1	511	11.6	3.6	0.565685	135.068	0.2	312
Con.67	male	71	178	78	Yes	Yes	Cataract	right	No	No	2	2	23.03	42.95	44.78	2.57	5.22	571	10.7	3.2	0.707107	45.0228	0.2	170	23.04	42.48	44.4	2.51	5.42	580	10.9	4.1	0.583095	149.112	0.2	351
Con.68	female	73	160	44	Yes	No	Cataract	left	No	No	1	1	24.4	42.16	42.4	3.51	4.49	514	12.4	2.9	0.538516	21.8125	0.2	148	24.3	41.79	42.24	3.28	4.84	533	12.6	3.1	0.424264	135.068	0.2	274
Con.69	male	73	171	65	Yes	No	Cataract	left	No	No	1	1	23.67	44.14	45.14	3.1	5.07	572	11.6	3.1	0.360555	33.7072	0.1	100	23.84	43.5	44.56	3.11	4.84	564	11.6	3	0.424264	135.068	0.2	338
Con.70	female	57	157	69	Yes	Yes	Cataract	right	No	No	1	1	24.11	42.79	43.72	3.58	3.83	583	11.9	3	0.538516	21.8125	0.4	206	23.89	43.28	43.83	3.61	3.76	572	11.7	2.9	0.5	143.203	0.2	291
Con.71	female	75	154.5	61	Yes	Yes	Cataract	right	No	No	2	2	23.65	42.4	43.3	2.84	4.35	538	11.2	2.5	0.632456	18.4443	0.4	209	23.59	42.57	42.54	2.81	4.41	550	11.2	2.1	0.5	143.203	0.2	293
Con.72	female	66	163	72.5	Yes	Yes	Cataract	right	No	No	3	1	22.91	45.18	45.48	3.52	4.4	540	11.6	3.9	0.447214	333.421	0.2	190	22.79	45.31	45.57	3.5	4.47	551	11.6	4.4	0.360555	146.384	0.2	326
Con.73	male	59	164	50.5	No	No	Cataract	right	No	No	1	1	23.48	42.37	42.57	3.35	4.17	508	12.1	3.7	0.538516	21.8125	0.3	199	23.24	42.67	42.84	3.29	4.17	522	12.2	4	0.447214	153.513	0.2	311
Con.74	female	60	157	57	No	No	Cataract	left	No	No	1	1	22.97	44.97	45.32	2.75	4.49	533	11.5	3.6	0.632456	288.399	0.2	261	22.92	44.82	45.65	2.75	4.45	549	11	3.6	0.447214	153.513	0.2	302
Con.75	male	66	156	51	Yes	No	Cataract	left	No	No	1	3	23.42	43.93	45.54	2.92	4.78	575	11.7	3.3	0.5	323.111	0.2	249	23.49	43.55	45.42	3.08	4.4	576	11.5	3.2	0.538516	158.279	0.2	331
Con.76	female	56	154	53	Yes	No	Cataract	left	No	No	1	1	23.21	44.9	45.07	3.51	3.9	482	11.8	3.2	0.360555	33.7072	0.3	168	23.27	44.45	44.67	3.5	3.99	481	11.7	3.1	0.538516	158.279	0.2	39
Con.77	male	73	160	52	No	No	Cataract	left	No	No	2	2	24.54	41.6	42.94	3.38	4.49	475	12.0907	4.80356	0.744164	13.6561	0.404605	186.997	24.5	42.51	43.38	3.44	4.49	489	12	5.3	0.223607	153.513	0.2	317
Con.78	male	78	164	72	Yes	Yes	Cataract	right	No	No	2	2	24.84	44.05	44.42	3.14	4.98	509	12.1	4.3	0.4	0	0.2	214	24.77	42.21	43.99	3.26	5.01	532	12.2	4.2	0.412311	166.048	0.2	331
Con.79	male	69	154	43	No	No	Cataract	right	No	No	2	2	23.84	44.93	45.38	3.09	4.35	489	12	3.5	0.412311	345.957	0.3	161	23.82	44.61	45.21	3.13	4.44	503	12.1	3.7	0.316228	161.647	0.2	316
Con.80	male	68	162	54	No	No	Cataract	left	No	No	2	2	24.88	43.9	46.33	3.36	4.4	498	11.3	3.9	0.447214	333.421	0.2	132	24.98	44.01	45.74	3.25	4.7	554	11.3	3.6	0.412311	166.048	0.2	206
Con.81	female	73	152	48	No	No	Cataract	right	No	No	3	3	22.71	43.33	45.14	2.41	5.27	477	11.5	3.3	0.447214	26.5785	0.3	175	22.68	43.82	44.75	2.37	5.26	490	11.8	3.5	0.412311	166.048	0.2	356
Con.82	male	76	173	56	No	No	Cataract	right	No	No	1	1	24.52	42.05	42.67	3.08	4.88	527	12.1	3.6	0.5	53.1571	0.1	95	24.52	42.65	42.65	3.16	4.87	543	12.3	3.3	0.412311	166.048	0.2	251
Con.83	female	83	150	61	Yes	No	Cataract	left	No	No	1	1	25.4	43.88	44.59	3.35	4.68	521	11.5	2.9	0.2	0	0.1	228	24.79	43.22	44.23	3.15	4.81	544	11.8	3.1	0.223607	153.513	0.2	287
Con.84	male	75	163	54	No	No	Cataract	right	No	No	1	2	23.48	44.94	46.58	3.19	5.11	542	11.7	2.9	0.1	0	0.1	70	24.15	44.79	46.25	3.17	5.07	559	11.7	2.9	0.1	90.0456	0.2	216
Con.85	female	76	163	58	No	No	Cataract	right	No	No	2	2	23.24	44.52	45.55	2.85	4.77	484	11.4	3.5	0.583095	30.9795	0.2	185	22.8	45.1	46.07	2.89	4.71	486	11.7	4.2	0.5	180.091	0.2	302
Con.86	female	67	153	58	Yes	No	Cataract	right	No	No	3	3	23.3	44.1	44.75	3.42	4.15	529	11.7	3.9	0.509902	281.27	0.3	253	23.33	44.15	44.62	3.31	4.22	532	11.4	3.6	0.4	180.091	0.2	234
Con.87	male	59	175	87	Yes	No	Cataract	right	No	No	1	1	23.22	44.77	45.38	3.63	4.06	519	11.3	3.1	0.412311	14.0434	0.3	117	23.2	44.92	45.3	3.3	4.59	516	11.4	3.6	0.5	180.091	0.2	30
Con.88	male	85	159	45	Yes	No	Cataract	right	No	No	2	1	23.12	44.4	45.25	3.01	5.01	496	10.3	2.9	1.34164	116.624	0.5	347	23.19	44.46	44.92	3.04	4.95	508	11.8	3.2	0.316228	198.353	0.2	289
Con.89	female	73	154	64	No	No	Cataract	left	No	No	2	2	24.1	43.61	44.92	3.03	4.17	516	12	3.2	0.412311	14.0434	0.2	156	24.06	43.98	45.19	3.04	4.26	530	12	2.9	0.316228	198.353	0.2	134
Con.90	female	56	167	60	No	No	Cataract	left	No	No	3	1	24.73	44.44	45.01	3.51	4.45	527	12.1	6.8	0.141421	45.0228	0.1	225	25.02	43.93	45.15	3.48	4.49	530	12.3	6.9	0.282843	224.932	0.2	228
Con.91	male	72	165	56	No	No	Cataract	left	No	No	1	3	25.19	40.12	41.16	3.12	4.93	489	12.3842	2.91769	0.588613	351.77	0.585869	264.067	25.13	40.65	41.72	3.04	4.96	498	12.6	3.1	0.2	269.954	0.2	238
Con.92	female	69	150	49	No	No	Cataract	right	No	No	3	3	22.54	44.62	45.1	3.17	4.09	533	12	3.6	0.538516	338.188	0.2	176	22.76	44.03	44.49	2.97	4.53	550	12.3	3.9	0.5	216.797	0.2	10
Con.93	female	56	146	53	No	No	Cataract	right	No	No	2	2	23.42	44.95	45.65	3.11	4.68	494	11.9	3.6	0.412311	345.957	0.4	195	23.25	45.03	45.62	3.07	4.53	503	12.1	4	0.640312	231.275	0.2	1
Con.94	female	74	145	74	Yes	No	Cataract	right	No	No	3	2	22.68	43.96	44.33	2.58	4.83	542	11.3	4.2	0.509902	348.684	0.1	229	22.77	43.7	44.27	2.5	4.63	543	11.3	4.1	0.781025	230.129	0.2	301
Con.95	female	80	161	65	Yes	No	Cataract	left	No	No	3	2	23.34	45.05	45.67	2.79	4.63	538	11.2	4.1	0.67082	63.4671	0.4	176	23.35	45.56	45.97	3.02	4.24	536	11.5	3.5	0.72111	236.247	0.2	319
Con.96	female	81	152	52	No	No	Cataract	left	No	No	2	3	23.79	43.99	44.34	2.8	4.93	508	11.8	3.1	0.141421	314.977	0.2	250	23.65	43.67	44.37	2.55	5.04	513	12.3	3.3	0.7	269.954	0.2	282
Con.97	male	73	162	70	Yes	No	Cataract	left	No	No	2	1	22.86	44.32	45.02	3.67	4	530	12	4.8	0.583095	300.934	0.2	204	22.83	45.02	45.26	3.6	4.01	528	12.1	4.8	0.894427	243.376	0.2	347
Con.98	female	75	150	43	Yes	Yes	Cataract	right	No	No	3	3	24.55	42.84	47.33	3.21	4.85	564	10.8	3.2	0.9	269.954	0.2	31	23.66	42.92	47.61	3.09	4.97	555	10.9	3.6	0.806226	262.826	0.2	129
Con.99	male	67	172	61.5	No	No	Cataract	left	No	No	2	2	23.39	43.14	44.54	2.88	5.65	535	11.8	2.9	0.412311	14.0434	0.1	206	23.4	44.05	44.24	2.88	5.6	549	11.5	3	0.806226	119.806	0.1	317
Con.100	female	80	153	55	Yes	No	Cataract	right	No	No	2	1	23.84	42.05	42.82	2.8	4.34	503	11.8	3.1	0.447214	63.4671	0.1	9	24.03	41.86	42.58	2.82	4.37	518	11.4	2.8	0.761577	113.256	0.1	315
Con.101	female	77	160	46	No	No	Cataract	left	No	No	2	1	21.79	47.22	47.69	3.14	4.75	504	11.2	3	0.583095	30.9795	0.2	187	21.73	47.1	47.65	3.13	4.64	502	11	3.2	0.583095	149.112	0.1	322
Con.102	male	72	173	58	No	No	Cataract	right	No	No	3	1	23.16	44.36	46.47	2.94	4.34	485	11.5	3.4	0.316228	341.556	0.2	211	23.01	44.8	46.94	3.01	4.22	490	11.1	3.1	0.424264	135.068	0.1	268
Con.103	male	65	163	67	Yes	Yes	Cataract	left	No	No	2	3	23.82	41.56	41.8	3.01	4.58	532	11.7	6.4	0.9	0	0.7	170	24.38	42.33	42.74	2.93	4.8	521	11.5	6.3	0.538516	158.279	0.1	17
Con.104	male	69	168	55	No	No	Cataract	left	No	No	1	1	25.18	40.07	40.82	3.42	4.51	566	12.7	4.2	0.4	0	0.1	82	25.19	40.56	40.98	3.35	4.5	562	12.5	4.1	0.538516	158.279	0.1	51
Con.105	female	56	158	62	No	No	Cataract	right	No	No	3	2	23.58	44.81	45.25	3.26	4.6	525	11.3	3.3	0.412311	14.0434	0.1	216	23.68	44.22	45.21	3.25	4.42	548	11.5	3.7	0.447214	153.513	0.1	339
Con.106	female	64	158	74	No	No	Cataract	right	No	No	2	3	25.05	45.3	46.9	3.52	3.68	522	10.9	4	0.2	90.0456	0.1	346	24.86	45.55	45.85	3.17	4.1	547	10.8	3.6	0.282843	135.068	0.1	194
Con.107	female	52	146	62	Yes	No	Cataract	right	No	No	1	2	23.7918	43.91	45.88	3.73	4.19	528	12	4.5	0.583095	30.9795	0.3	193	23.91	44.56	46.33	4.04	3.92	515	12.1	3.5	0.2	90.0456	0.1	187
Con.108	male	70	162	52.5	Yes	No	Cataract	left	No	No	1	1	23.53	45.22	45.48	3.17	4.53	563	11.9	2.5	0.316228	18.4443	0.1	184	23.6	45.18	45.87	3.23	4.45	579	12	2.9	0.360555	146.384	0.1	234
Con.109	female	75	150	46	No	No	Cataract	left	No	No	2	3	22.61	44.09	44.93	3.03	4.8	466	11.6	3.6	0.360555	33.7072	0.1	206	22.71	44.5	44.5	3.33	4.32	489	11.7	3.7	0.316228	161.647	0.1	333
Con.110	male	73	165	70	Yes	No	Cataract	right	No	No	2	3	24.1	41.92	42.73	3.46	5.07	535	12.3	4	0.4	0	0.2	191	24.22	41.82	42.38	3.44	5.14	525	12.5	3.5	0.412311	166.048	0.1	318
Con.111	female	66	163	51	No	No	Cataract	left	No	No	3	3	24.32	42.64	42.98	3.5	4.46	529	12	3.4	0.583095	30.9795	0.2	116	24.18	42.29	42.8	3.37	4.54	543	11.9	3.2	0.608276	170.624	0.1	41
Con.112	female	64	148	57	No	Yes	Cataract	left	No	No	2	2	23.7	44.93	45.27	3.48	4.1	509	11.7	3.5	0.316228	18.4443	0.2	169	23.75	44.85	45.41	3.45	4.09	530	11.9	3.1	0.316228	161.647	0.1	310
Con.113	male	73	164	50	No	No	Cataract	left	No	No	1	1	23.78	43.54	44.23	3.28	4.92	553	12	3	0.412311	345.957	0.3	136	23.72	43.27	44.19	3.38	4.8	561	11.6	3	0.141421	135.068	0.1	54
Con.114	female	77	150	51	Yes	No	Cataract	right	No	Yes	2	1	24.83	41.89	44.03	3.32	4.29	484	11.8	3.4	1.21655	279.421	1.2	95	25.04	42.11	43.73	3.09	4.63	502	11.8	2.9	0.141421	135.068	0.1	170
Con.115	female	60	150	60	Yes	Yes	Cataract	right	No	No	3	2	24.2464	41.51	44.43	2.92	3.99	551	10.7	4.5	0.412311	345.957	0.1	197	23.73	43.92	45.44	3.45	3.5	525	10.9	5.8	0.1	180.091	0.1	174
Con.116	female	67	152	80	Yes	Yes	Cataract	right	No	No	3	3	23.99	43.27	44.16	3.62	4.4	535	11.6	3.9	0.848528	314.977	0.9	106	23.76	43.51	44.37	3.52	4.37	548	11.6	4	0.4	180.091	0.1	133
Con.117	male	60	174	83	No	No	Cataract	right	No	No	1	1	25.23	40.6	41.54	2.94	5.17	508	12.3	2.9	0.509902	348.684	0.2	158	25.44	40.31	40.92	2.79	5.14	518	12.2	3.3	0.3	180.091	0.1	45
Con.118	female	55	163	63	Yes	Yes	Cataract	left	No	No	2	2	25.06	43.85	45.69	3.48	3.86	561	11.8	3.9	1.3	67.4143	1.3	256	25.01	43.31	45.55	3.44	4.09	568	11.8	3.3	0.5	180.091	0.1	17
Con.119	female	65	161	56	Yes	No	Cataract	right	No	No	3	2	21.94	44.7	45.73	2.52	5.1	527	11.2	3.3	0.538516	21.8125	0.3	173	21.98	45.12	46.11	2.51	4.73	552	11.1	2.9	0.4	180.091	0.1	67
Con.120	female	58	154	45	No	No	Cataract	left	No	No	1	3	22.45	45.14	46.15	3.32	3.43	506	11.3	2.8	0.5	0	0.1	188	22.37	44.82	45.98	3.21	3.66	526	11.4	2.9	0.6	180.091	0.1	20
Con.121	female	64	152	50	No	No	Cataract	right	No	No	2	3	23.26	43.79	44.54	2.71	4.9	507	11.5	3	0.316228	18.4443	0.2	234	22.93	44.11	45.12	2.67	4.8	511	11.7	2.5	0.3	180.091	0.1	207
Con.122	male	73	166	73	Yes	No	Cataract	left	No	No	2	3	25.67	43.72	45.01	3.27	4.59	583	11.9	3.7	0.360555	326.293	0.1	112	25.72	43.88	44.83	3.27	4.63	578	11.8	4.1	0.509902	191.224	0.1	49
Con.123	female	67	146	42	No	No	Cataract	left	No	No	1	1	23.81	43.16	43.45	2.49	4.95	516	11.8	3.8	0.5	323.111	0.2	186	23.75	43.55	43.55	2.5	5.07	531	11.6	3.8	0.608276	189.376	0.1	5
Con.124	female	64	164	52	Yes	No	Cataract	right	No	No	3	2	24.84	46.4	47.93	3.37	4.75	520	11.4	2.9	0.316228	341.556	0.1	54	23.52	45.93	47.91	3.23	4.75	528	11.7	3	0.360555	213.616	0.1	291
Con.125	male	79	168	78	Yes	No	Cataract	right	Yes	No	3	2	24.19	40.63	43.82	3.28	5.27	520	12.1	3	0.223607	26.5785	0.2	251	24.13	41.78	43.73	3.16	5.45	522	12.3	3.1	0.632456	251.51	0.1	229
Con.126	male	80	155	68	Yes	Yes	Cataract	left	No	No	2	3	25.66	41.8	42.37	2.85	5.09	510	11.9	2.7	0.4	0	0.3	186	25.96	41.8	42.17	3.03	5.02	529	12.1	2.4	0.316228	161.647	0	209
Con.127	male	50	170	74	Yes	Yes	Cataract	right	No	No	3	3	24.19	43.92	44.89	3.86	3.66	500	12.2	3.6	0.3	0	0.1	203	23.92	44.45	45.22	3.46	3.87	511	12	3	0.3	180.091	0	301
Con.128	female	70	158	69	Yes	Yes	Cataract	right	No	No	1	1	23.12	44.18	45.28	2.96	4.31	552	11.3	3.3	0.5	0	0.1	171	23.2	44.49	45.67	3	4.28	562	11.4	2.9	0.4	180.091	0	321
Con.129	female	83	150	70	Yes	No	Cataract	left	No	No	3	3	23.45	44.08	46.13	2.76	4.68	502	11.3	3.5	0.707107	314.977	0.2	194	23.7	43.84	44.14	2.81	4.62	500	11.4	3.3	0.5	216.797	0	181
Con.130	male	82	145	46	No	No	Cataract	right	No	No	1	1	23.54	43.6	44.83	2.81	5.03	496	12.3	4.2	1.772	286.352	0.5	174	23.22	43.46	47.18	2.86	4.92	521	12	4.48418	1.29356	242.501	1.00768	239.265
Con.131	male	75	163	72	Yes	Yes	Cataract	right	No	No	3	1	23.61	43.74	44.39	2.93	4.29	497	11.6	2.9	0.5	36.8886	0.3	229	23.6	44.12	44.64	2.94	4.26	519	11.8	2.6112	0.707591	119.464	0.239227	311.311
Con.132	female	83	155	61	No	Yes	Cataract	right	No	No	1	1	22.36	43.68	45.39	2.69	5.09	517	10.8	2.8	1.27279	45.0228	0.5	196	22.56	45.15	45.31	2.78	4.98	521	11.0302	3.73595	0.468545	171.644	0.278031	132.005
